# Supplementary material
Source: PubMed Central journal article supplement (PMC5882020)
Supplement: supplementary_table1.pdf [file supplementary_table1.pdf]

**Title**

“Current model systems for the study of preeclampsia”

**Journal name:** Experimental Biology and Medicine

**Authors**

ML Martinez-Fierro, GP Hernández-Delgadillo, V Flores-Morales, E Cardenas-Vargas, M Mercado-Reyes, IP Rodriguez-Sanchez, I Delgado-Enciso, CE Galván-Tejada, JI Galván-Tejada, JM Celaya-Padilla, I Garza-Veloz <sup>†</sup>.

**<sup>†</sup>Corresponding author**

Molecular Medicine Laboratory, Unidad Academica de Medicina Humana y C.S.

Universidad Autonoma de Zacatecas.

Carretera Zacatecas-Guadalajara Km.6. Ejido la Escondida, C.P. 98160,

Zacatecas, Mexico

E-mail address: [idaligv@uaz.edu.mx](mailto:idaligv@uaz.edu.mx)

**Table 1. Preeclampsia *in vitro* research model systems**

| Type         | Models                                                                                                                                                                                                                                                                                                                                                                            | Method                                                                                                                                                                                                                                                                                                                                                                                                                                                                                                                                                                                                                                                                                  | Species | Description                   | Advantages                                                                                                                                                                                                                                                                     | Disadvantages                                                                                                                                                                                                                                                                                                                                                                                                                                                                                                                                                                                                                                                              | References |
|--------------|-----------------------------------------------------------------------------------------------------------------------------------------------------------------------------------------------------------------------------------------------------------------------------------------------------------------------------------------------------------------------------------|-----------------------------------------------------------------------------------------------------------------------------------------------------------------------------------------------------------------------------------------------------------------------------------------------------------------------------------------------------------------------------------------------------------------------------------------------------------------------------------------------------------------------------------------------------------------------------------------------------------------------------------------------------------------------------------------|---------|-------------------------------|--------------------------------------------------------------------------------------------------------------------------------------------------------------------------------------------------------------------------------------------------------------------------------|----------------------------------------------------------------------------------------------------------------------------------------------------------------------------------------------------------------------------------------------------------------------------------------------------------------------------------------------------------------------------------------------------------------------------------------------------------------------------------------------------------------------------------------------------------------------------------------------------------------------------------------------------------------------------|------------|
| Cell culture | <ul style="list-style-type: none"> <li>- To understand trophoblast cell biology, immunology, endocrine function and placental development.</li> <li>- To assess the effect of differentiation and fusion on the expression and release of a PE marker.</li> <li>- To study the regulation of trophoblast apoptosis and placental development under hypoxic conditions.</li> </ul> | <p><b>Trophoblast cell lines:</b></p> <ul style="list-style-type: none"> <li>- ED27</li> <li>- ED31</li> <li>- ED77</li> <li>- HP-A1</li> <li>- HP-A2</li> <li>- HP-W1</li> <li>- HT</li> <li>- HT-116</li> <li>- HTR-8</li> <li>- HTR-8/Svneo</li> <li>- IST-1</li> <li>- NHT</li> <li>- NPC</li> <li>- RSVT-2</li> <li>- RSVT2/C</li> <li>- SGHPL-4</li> <li>- SGHPL-5</li> <li>- SGHPL-6</li> <li>- SGHPL-7</li> <li>- SPA-26+7 lines</li> <li>- TCL-1</li> <li>- TL</li> </ul> <p><b>Malignant choriocarcinoma cell lines:</b></p> <ul style="list-style-type: none"> <li>- AC1</li> <li>- AC1-1</li> <li>- AC1-5</li> <li>- AC1-9</li> <li>- AC-1M32</li> <li>- AC-1M46</li> </ul> | Human   | Cell cultures of trophoblast. | Isolated primary trophoblast no longer proliferates in culture. Thus, only short-term cultures can be performed with primary cells. Therefore, respective cell lines have been developed to overcome the handicap of missing proliferation of primary trophoblasts in culture. | <ul style="list-style-type: none"> <li>- Although a panel of markers and phenotypic criteria have been established to characterize the cell lines so they can be considered a trophoblast cell, very few of them have been evaluated for expression of these specific factors, probably due to the availability of well-characterized reagents for evaluation.</li> <li>- The methods employed to extend lifespan (transfection or spontaneous immortalization/transformation) alter regulation of cell division and may impact on differentiated functions and gene expression not usually observed in trophoblast cells <i>in vivo</i> or in primary culture.</li> </ul> | (1-3)      |

|  |                                                                                                                                                                                                                                                                                                                                                                                                |                                                                                                                                                                                                                                                                                                                                                                                         |       |                                                                                                                                                                                                   |                                                                                                                                                                                                                                                 |                                                                                                                                                                                                      |       |
|--|------------------------------------------------------------------------------------------------------------------------------------------------------------------------------------------------------------------------------------------------------------------------------------------------------------------------------------------------------------------------------------------------|-----------------------------------------------------------------------------------------------------------------------------------------------------------------------------------------------------------------------------------------------------------------------------------------------------------------------------------------------------------------------------------------|-------|---------------------------------------------------------------------------------------------------------------------------------------------------------------------------------------------------|-------------------------------------------------------------------------------------------------------------------------------------------------------------------------------------------------------------------------------------------------|------------------------------------------------------------------------------------------------------------------------------------------------------------------------------------------------------|-------|
|  |                                                                                                                                                                                                                                                                                                                                                                                                | <ul style="list-style-type: none"> <li>- AC-1M59</li> <li>- AC-1M81</li> <li>- AC-1M88</li> <li>- BeWo</li> <li>- BeWo MC-1</li> <li>- BeWo MC-2</li> <li>- JAR</li> <li>- JEG</li> </ul> <p><b>Embryonal lines with trophoblast differentiation:</b></p> <ul style="list-style-type: none"> <li>- H9</li> <li>- HT-H</li> <li>- NCC-EC-3</li> <li>- NCCIT</li> <li>- NCR-G3</li> </ul> |       |                                                                                                                                                                                                   |                                                                                                                                                                                                                                                 |                                                                                                                                                                                                      |       |
|  | <p>To determine:</p> <ul style="list-style-type: none"> <li>- Oxidative stress.</li> <li>- Effects of syncytiotrophoblast-derived microparticles in the maternal circulation, serum or plasma from patients with PE on proliferation, injury and apoptosis of human umbilical vein endothelial cells.</li> <li>- Effects of PE biomarkers or molecules with therapeutic potentials.</li> </ul> | Normal primary umbilical vein endothelial cells (HUVECs).                                                                                                                                                                                                                                                                                                                               | Human | HUVECs cultured with syncytiotrophoblast-derived microparticles, serum, plasma, molecules or drugs for the evaluation of proliferation, apoptosis rates of the HUVECs and therapeutic properties. | - This cell line is ideal for evaluating immune response, wound healing, cellular response to viral or bacterial infection, oxidative stress, angiogenesis, arteriosclerosis, drug screening and tubule formation, mechanisms implicated in PE. | - HUVECs are limited to 10–15 population doublings. Continued passaging beyond 15 doublings (4–5 passages after receipt) may result in decreased growth rates and loss of biological responsiveness. | (4-8) |

|  |                                                                                                                                                                                                                                       |                                                                                                                                                                                            |              |                                                                                                                                                                                                                                                                                                                                                                                     |                                                                                                                                                                                                                                                                                                                                                                   |                                                                                                                                                                                                                                          |                |
|--|---------------------------------------------------------------------------------------------------------------------------------------------------------------------------------------------------------------------------------------|--------------------------------------------------------------------------------------------------------------------------------------------------------------------------------------------|--------------|-------------------------------------------------------------------------------------------------------------------------------------------------------------------------------------------------------------------------------------------------------------------------------------------------------------------------------------------------------------------------------------|-------------------------------------------------------------------------------------------------------------------------------------------------------------------------------------------------------------------------------------------------------------------------------------------------------------------------------------------------------------------|------------------------------------------------------------------------------------------------------------------------------------------------------------------------------------------------------------------------------------------|----------------|
|  | <p>To evaluate:</p> <ul style="list-style-type: none"> <li>- Basic mechanisms of gene regulation in trophoblast cell lineage differentiation.</li> <li>- Placenta development.</li> <li>- Vascularization of the placenta.</li> </ul> | <ul style="list-style-type: none"> <li>- Connexins and trophoblast cell lineage development.</li> <li>- Placental vascular development through ubiquitin ligase Ankyrin repeat.</li> </ul> | <p>Mouse</p> | <ul style="list-style-type: none"> <li>- Generation of trophoblast stem cell lines from connexin-deficient mice. This may be used to elucidate the mechanism of differentiation and the role of genes and cell types in the development of the placenta.</li> <li>- Differentiation of embryonic stem cell to vascular lineage through ubiquitin ligase Ankyrin repeats.</li> </ul> | <p>Placentation in mice involves similar cell biological events to humans, without the ethical problems of abortion and the availability of sufficient tissues for research. One major point is that the most important steps of trophoblast differentiation occur within the first weeks of gestation.</p>                                                       | <p>Generation of trophoblast stem cells from knockout blastocysts seems to be accompanied by more methodological problems, especially if the genes that are deleted alter the differentiation pathway.</p>                               | <p>(9, 10)</p> |
|  | <ul style="list-style-type: none"> <li>- Human placentation and its potential in cell therapy applications.</li> <li>- Invasive implantation events.</li> </ul>                                                                       | <ul style="list-style-type: none"> <li>- Cytotrophoblast stem (CTBS) cell lines derived from human embryonic stem cells.</li> </ul>                                                        | <p>Human</p> | <ul style="list-style-type: none"> <li>- Generation of cytotrophoblast cell lines isolated from embryoid bodies and selected for trophoblast enrichment by rounds of cellular aggregation and disaggregation.</li> </ul>                                                                                                                                                            | <ul style="list-style-type: none"> <li>- First human CTBS cell lines to be derived from human embryonic stem cells and then maintained independently without feeder cells.</li> <li>- Differ from immortalized placental lines in that they have multipotent capacity to differentiate to various trophoblast phenotypes including syncytiotrophoblast</li> </ul> | <ul style="list-style-type: none"> <li>- To acquire the physiology of CTBS cells, spheroidal trophoblast bodies and matrigel are required to resemble the implanting embryo and mimic the endometrial deciduas, respectively.</li> </ul> | <p>(11)</p>    |

|          |                                         |                                                                                                                                                  |              |                                                                                                                                                                                                                                                                            |                                                                                                              |                                                                                                                                                                                                                    |          |
|----------|-----------------------------------------|--------------------------------------------------------------------------------------------------------------------------------------------------|--------------|----------------------------------------------------------------------------------------------------------------------------------------------------------------------------------------------------------------------------------------------------------------------------|--------------------------------------------------------------------------------------------------------------|--------------------------------------------------------------------------------------------------------------------------------------------------------------------------------------------------------------------|----------|
|          |                                         |                                                                                                                                                  |              |                                                                                                                                                                                                                                                                            | and extravillous cytotrophoblast.                                                                            |                                                                                                                                                                                                                    |          |
| Explants | Trophoblast invasion                    | - First-trimester villous explants (to study postimplantation events, early stages of placentation and cytotrophoblast invasion).                | Human        | First-trimester floating villi in contact with a permissive extracellular matrix substrate stimulates cytotrophoblast proliferation and its column formation.                                                                                                              | - Trophoblast is conditioned by co-culture with appropriate cells.                                           | - Inability to identify the activities of individual cell types.<br>- Drugs, oxygen, infections, nutrients, hormones, xenobiotics or cytokines can affect tissue functions and survival.                           | (12, 13) |
|          |                                         | - Trans-filter cytotrophoblast migration (to study the phase of migration when single cells move through the decidual or myometrial environment) | Human, mouse | Purified primary first-trimester cytotrophoblast cell suspension.                                                                                                                                                                                                          | It can be used quantitatively, providing good quality control.                                               | - Minimal contamination by connective tissue cells may migrate or proliferate faster than trophoblast during the assay period.<br>- Cytotrophoblasts are not unequivocally identifiable by morphological criteria. | (13, 14) |
|          | Trophoblast invasion of spiral arteries | Spiral artery invasion and remodeling, developed using spiral artery explants, extravillous trophoblast cell lines and primary cytotrophoblasts. | Human        | Fluorescently labeled trophoblasts (either primary first-trimester extravillous trophoblasts or an extravillous trophoblast cell line) are seeded on top of spiral artery segments (obtained from uterine biopsies at Caesarean section) embedded in fibrin gels (to study | It is useful for studies that lack suitable models directly examining cellular interactions during invasion. | Difficult to manipulate arteries and handle the co-culture.                                                                                                                                                        | (15)     |

|                                                |                                         |       |                                                                                                                                                                                                                                                     |                                                                                                                                                                                                                                                                                                                                                                                                                                                       |                                                                                                                                                                                                                                                                                                                                                                                                                                                                                      |         |  |
|------------------------------------------------|-----------------------------------------|-------|-----------------------------------------------------------------------------------------------------------------------------------------------------------------------------------------------------------------------------------------------------|-------------------------------------------------------------------------------------------------------------------------------------------------------------------------------------------------------------------------------------------------------------------------------------------------------------------------------------------------------------------------------------------------------------------------------------------------------|--------------------------------------------------------------------------------------------------------------------------------------------------------------------------------------------------------------------------------------------------------------------------------------------------------------------------------------------------------------------------------------------------------------------------------------------------------------------------------------|---------|--|
|                                                |                                         |       |                                                                                                                                                                                                                                                     | interstitial invasion) or perfused into the lumen of arteries (to study endovascular invasion). Both interstitial and endovascular interactions/invasion can be detected and immunohistochemical analyses carried out.                                                                                                                                                                                                                                |                                                                                                                                                                                                                                                                                                                                                                                                                                                                                      |         |  |
| Probe preventive and therapeutic agents for PE | Extravillous trophoblast.               | Human | Chorion from term placentas was digested and extravillous trophoblast isolated, then it was used to investigate the effect of unfractionated, low-molecular-weight heparin and aspirin on <i>in vitro</i> extravillous trophoblast differentiation. | <ul style="list-style-type: none"> <li>- Although the model was developed to study thrombophilia, it is useful to apply in the study of PE.</li> <li>- It is a useful tool for demonstrating any effect of putative therapeutics on extravillous trophoblast, especially during very early placentation since defects in extravillous trophoblast function could play an important role in the etiology of pregnancy disorders such as PE.</li> </ul> | <ul style="list-style-type: none"> <li>- It has been reported that these kinds of cells are only partly involved in the release of any of the predictive biomarkers available today.</li> <li>- They no longer proliferate in culture. Hence, only short-term cultures for some days can be performed. At the same time these cells spontaneously syncytialize in culture and thus may be of use to study the release of syncytial fragments and factors <i>in vitro</i>.</li> </ul> | (16)    |  |
| Oxidative stress                               | Villous trophoblast and amniotic tissue | Human | Term placenta was digested and villous                                                                                                                                                                                                              | This culture represents a useful                                                                                                                                                                                                                                                                                                                                                                                                                      | - They no longer proliferate in culture. Hence, only short-term                                                                                                                                                                                                                                                                                                                                                                                                                      | (8, 17) |  |

|     |                                                                                                                                                                                 |                   |       |                                                                                                                                                                                                                                                                                                                                                                                                              |                                                                                                                                                                                                                                                    |                                                                                                                                                                                                                                                                                                                                                                                                            |          |
|-----|---------------------------------------------------------------------------------------------------------------------------------------------------------------------------------|-------------------|-------|--------------------------------------------------------------------------------------------------------------------------------------------------------------------------------------------------------------------------------------------------------------------------------------------------------------------------------------------------------------------------------------------------------------|----------------------------------------------------------------------------------------------------------------------------------------------------------------------------------------------------------------------------------------------------|------------------------------------------------------------------------------------------------------------------------------------------------------------------------------------------------------------------------------------------------------------------------------------------------------------------------------------------------------------------------------------------------------------|----------|
|     |                                                                                                                                                                                 | cultures.         |       | cytotrophoblasts isolated, then they were used to evaluate the effects of antioxidant vitamins C and E on trophoblast in culture. Villous and amniotic tissue cultures and stimulation with 4-hydroxy-nonenal, natrium fluoride and xanthine/xanthine oxidase.                                                                                                                                               | <i>in vitro</i> model system to assess drug effectiveness.                                                                                                                                                                                         | cultures for some days can be performed.<br>- At the same time these cells spontaneously syncytialize in culture and thus may be of use to study the release of syncytial fragments and factors <i>in vitro</i> .                                                                                                                                                                                          |          |
|     | - Placental metabolism and syncytiotrophoblast death.<br>- Effect of anti-hypertensive drugs on placental hormones and angiogenic protein synthesis, known to be altered in PE. | Villous explants. | Human | - First- and third-trimester human placental explants were cultured with antiphospholipid antibodies, and several metabolites with important roles in cell death regulatory pathways were analyzed.<br>- Placental villous explants from late onset PE were cultured at 20% oxygen with variable doses of anti-hypertensive drugs. The levels of different molecules were measured in explant culture media. | Useful to study various facets of the materno-fetal interface, including analysis of placental endocrine function, metabolism, transport and to dissect cellular processes such as proliferation, differentiation, apoptosis and syncytial fusion. | - Deficient availability of fresh material for explant cultures.<br>- Villous explants are not regularly stored frozen. Hence, placental tissues can only be used directly after delivery, and explant cultures using tissues from a single placenta cannot be repeated at a later date. So to overcome this problem a larger number of villous explants derived from a single placenta could be explored. | (18, 19) |
| Co- | Immune response                                                                                                                                                                 | - Macrophage-     | Human | - Isolation and cell                                                                                                                                                                                                                                                                                                                                                                                         | None of the co-                                                                                                                                                                                                                                    | - The type of cytokines                                                                                                                                                                                                                                                                                                                                                                                    | (20-24)  |

|          |                                                                                   |                                                                                                                                                                                                                                                                                                                                                                                                                                                                                                                                                                                                                                                          |       |                                                                                                                                                                                                                                                                                                                                                                                                                            |                                                                                          |                                                                                                                                                                                                                                                                                                                                             |         |
|----------|-----------------------------------------------------------------------------------|----------------------------------------------------------------------------------------------------------------------------------------------------------------------------------------------------------------------------------------------------------------------------------------------------------------------------------------------------------------------------------------------------------------------------------------------------------------------------------------------------------------------------------------------------------------------------------------------------------------------------------------------------------|-------|----------------------------------------------------------------------------------------------------------------------------------------------------------------------------------------------------------------------------------------------------------------------------------------------------------------------------------------------------------------------------------------------------------------------------|------------------------------------------------------------------------------------------|---------------------------------------------------------------------------------------------------------------------------------------------------------------------------------------------------------------------------------------------------------------------------------------------------------------------------------------------|---------|
| cultures |                                                                                   | <p>trophoblast interactions.</p> <ul style="list-style-type: none"> <li>- Trophoblast-derived cell line co-cultured with peripheral blood mononuclear cells under hypoxic conditions.</li> <li>- Maternal neutrophils co-cultured with the syncytiotrophoblast microvillous membranes.</li> </ul> <p>Factors in plasma of PE women activate endothelial cells to produce IL-8 resulting in transendothelial migration of neutrophils.</p> <ul style="list-style-type: none"> <li>- Interaction between natural killer cells and villous explants from concordant first-trimester pregnancies co-cultured in a collagen model of placentation.</li> </ul> |       | <p>culture of macrophages, primary trophoblasts, peripheral blood mononuclear cell, neutrophils and natural killer cells.</p> <ul style="list-style-type: none"> <li>- Co-culturing of macrophages-trophoblast, trophoblast-peripheral blood mononuclear cells, neutrophils-syncytiotrophoblast microvillous membranes, and natural killer-villous explants.</li> <li>- Evaluating the co-culture interactions.</li> </ul> | <p>cultured cells affect proliferation, apoptosis and cell column formation.</p>         | <p>produced by a macrophage depends on its activation state.</p> <ul style="list-style-type: none"> <li>- The type of effect in the inflammatory response depends upon the state of trophoblast.</li> <li>- The co-cultures need a scaffold that allows a 3D conformation leading to cell-cell interaction and column formation.</li> </ul> |         |
|          | Trophoblast proliferation, migration, invasion and endothelial cell interactions. | HTR-8/SVneo trophoblast cells or trophoblast-derived JEG-3 cells co-cultured with                                                                                                                                                                                                                                                                                                                                                                                                                                                                                                                                                                        | Human | Trophoblast migration and interactions with endometrial endothelial cells were                                                                                                                                                                                                                                                                                                                                             | - To evaluate the effect of each cell line co-cultured on the proliferative and invasive | <ul style="list-style-type: none"> <li>- These models only identified the maternal physical properties of the invasion.</li> <li>- The difficulty in obtaining the samples on a regular basis also</li> </ul>                                                                                                                               | (25-27) |



|                         |                          |                                                                                                                                                          |       |                                                                                                                                                                                                    |                                                                                                                                                                                                                                                                                                    |                                                                                                                                                                                                                                       |      |
|-------------------------|--------------------------|----------------------------------------------------------------------------------------------------------------------------------------------------------|-------|----------------------------------------------------------------------------------------------------------------------------------------------------------------------------------------------------|----------------------------------------------------------------------------------------------------------------------------------------------------------------------------------------------------------------------------------------------------------------------------------------------------|---------------------------------------------------------------------------------------------------------------------------------------------------------------------------------------------------------------------------------------|------|
|                         |                          | human uterine myometrial microvascular endothelial cells or with human endometrial endothelial cells into formation of capillary-like cellular networks. |       | measured using Transwell permeable support or co-cultured in matrigel.                                                                                                                             | properties of the other.<br>- To evaluate antihypertensive and anti-inflammatory drugs that can modulate the interaction between trophoblast and endothelial cells.<br>- These are 3D models (cellular networks) that likely mimic the trophoblast interaction with endothelium during remodeling. | prohibited these models' widespread use.                                                                                                                                                                                              |      |
|                         | Cytotrophoblast invasion | Cytotrophoblast co-cultured with human uterine spiral artery smooth muscle cell.                                                                         | Human | Transwell migration assay was used to detect the invasive ability of cytotrophoblast co-cultured with human uterine spiral artery smooth muscle cell, incubated with normal or preeclamptic serum. | Cytotrophoblast cultured alone with normal or preeclamptic serum was lower than cytotrophoblast cultured with human uterine spiral artery smooth muscle cells.                                                                                                                                     | Because placental immunological tolerance is regulated by many factors, this <i>in vitro</i> model might not fully represent the <i>in vivo</i> situation of uterine spiral artery remodeling in PE.                                  | (28) |
| Placental organ culture | Placenta biology         | Placenta-on-a-Chip.                                                                                                                                      | Human | A 'Placenta-on-a-Chip' is a microsystem that consists of two polydimethylsiloxane microfluidic channels separated by a thin extracellular matrix                                                   | - Replicates the architecture and function of the placenta.<br>- Provides new opportunities to simulate and analyze critical                                                                                                                                                                       | - Although the microfluidic culture system provides a greater physiological cell culture environment than conventional static cultures, the levels of shear stress generated in the model are substantially lower than those in fetal | (29) |

|  |  |  |  |                                                                                                                                                                                                                                                                                                          |                                                                                                                                                                                                                                                                                                                                                                           |                                                                                                                                                                                                                                                                                                                                                                                 |  |
|--|--|--|--|----------------------------------------------------------------------------------------------------------------------------------------------------------------------------------------------------------------------------------------------------------------------------------------------------------|---------------------------------------------------------------------------------------------------------------------------------------------------------------------------------------------------------------------------------------------------------------------------------------------------------------------------------------------------------------------------|---------------------------------------------------------------------------------------------------------------------------------------------------------------------------------------------------------------------------------------------------------------------------------------------------------------------------------------------------------------------------------|--|
|  |  |  |  | <p>membrane. To reproduce the placental barrier, human trophoblasts (JEG-3) and human umbilical vein endothelial cells (HUVECs) are seeded on the opposite sides of the membrane and cultured under dynamic flow conditions to form confluent epithelial and endothelial layers in close apposition.</p> | <p>physiological responses of the placental barrier.</p> <ul style="list-style-type: none"> <li>- It is a low-cost experimental platform with a broad range of applications.</li> <li>- Overcomes the limitations that the current <i>in vitro</i> models have in recapitulating the organ-specific structure and key physiological functions of the placenta.</li> </ul> | <p>capillaries. This is mainly due to the large size of the cell culture chambers.</p> <ul style="list-style-type: none"> <li>- It has only been proved by employing the JEG-3 cell line and HUVECs to represent trophoblast and endothelial cells, respectively. It could be better if it employs primary human trophoblasts and fetal capillary endothelial cells.</li> </ul> |  |
|--|--|--|--|----------------------------------------------------------------------------------------------------------------------------------------------------------------------------------------------------------------------------------------------------------------------------------------------------------|---------------------------------------------------------------------------------------------------------------------------------------------------------------------------------------------------------------------------------------------------------------------------------------------------------------------------------------------------------------------------|---------------------------------------------------------------------------------------------------------------------------------------------------------------------------------------------------------------------------------------------------------------------------------------------------------------------------------------------------------------------------------|--|

## References

1. King A, Thomas L, Bischof P. Cell culture models of trophoblast II: trophoblast cell lines--a workshop report. *Placenta*. 2000;21 Suppl A:S113-9.
2. Shiverick KT, King A, Frank H, Whitley GS, Cartwright JE, Schneider H. Cell culture models of human trophoblast II: trophoblast cell lines--a workshop report. *Placenta*. 2001;22 Suppl A:S104-6.
3. Jeon SY, Lee HJ, Na KH, Cha DH, Kim JK, Park JW, et al. Hypoxia-induced downregulation of XIAP in trophoblasts mediates apoptosis via interaction with IMUP-2: implications for placental development during pre-eclampsia. *Journal of cellular biochemistry*. 2013;114(1):89-98.
4. Chen Y, Huang Y, Jiang R, Teng Y. Syncytiotrophoblast-derived microparticle shedding in early-onset and late-onset severe pre-eclampsia. *International journal of gynaecology and obstetrics: the official organ of the International Federation of Gynaecology and Obstetrics*. 2012;119(3):234-8.
5. Li LX, Li XF, Zhang LL, Zhang Y, Guo RX, Zhang XY, et al. [Effects of plasma from patients with preeclampsia on the proliferation and apoptosis of human umbilical vein endothelial cells and its relationship with lysophosphatidic acid receptors]. *Zhonghua fu chan ke za zhi*. 2013;48(2):102-6.

6. Wu C, Yuan J, Sui R, Li S, Sun J. Tanshinone II-A is protective against human umbilical vein endothelial cell injury after exposure to serum from preeclampsia patients. *Gynecologic and obstetric investigation*. 2014;78(2):101-8.
7. Borges LE, Bloise E, Dela Cruz C, Galleri L, Apa R, Petraglia F, et al. Urocortin 1 expression and secretion by human umbilical vein endothelial cells: In vitro effects of interleukin 8, interferon gamma, lipopolysaccharide, endothelin 1, prostaglandin F-2alpha, estradiol, progesterone and dexamethasone. *Peptides*. 2015;74:64-9.
8. Tskitishvili E, Sharentuya N, Temma-Asano K, Mimura K, Kinugasa-Taniguchi Y, Kanagawa T, et al. Oxidative stress-induced S100B protein from placenta and amnion affects soluble Endoglin release from endothelial cells. *Molecular human reproduction*. 2010;16(3):188-99.
9. Kibschull M, Winterhager E. Connexins and trophoblast cell lineage development. *Methods in molecular medicine*. 2006;121:149-58.
10. Townley-Tilson WH, Wu Y, Ferguson JE, 3rd, Patterson C. The ubiquitin ligase ASB4 promotes trophoblast differentiation through the degradation of ID2. *PloS one*. 2014;9(2):e89451.
11. Harun R, Ruban L, Matin M, Draper J, Jenkins NM, Liew GC, et al. Cytotrophoblast stem cell lines derived from human embryonic stem cells and their capacity to mimic invasive implantation events. *Hum Reprod*. 2006;21(6):1349-58.
12. Miller RK, Genbacev O, Turner MA, Aplin JD, Caniggia I, Huppertz B. Human placental explants in culture: approaches and assessments. *Placenta*. 2005;26(6):439-48.
13. Aplin JD. In vitro analysis of trophoblast invasion. *Methods in molecular medicine*. 2006;122:45-57.
14. Suenaga A, Tachi C, Tojo H, Tanaka S, Tsutsumi O, Taketani Y. Quantitative analysis of the spreading of the mouse trophoblast in vitro: a model for early invasion. *Placenta*. 1996;17(8):583-90.
15. Cartwright JE, Wareing M. An in vitro model of trophoblast invasion of spiral arteries. *Methods Mol Med*. 2006;122:59-74.
16. Quenby S, Mountfield S, Cartwright JE, Whitley GS, Vince G. Effects of low-molecular-weight and unfractionated heparin on trophoblast function. *Obstetrics and gynecology*. 2004;104(2):354-61.
17. Tannetta DS, Sargent IL, Linton EA, Redman CW. Vitamins C and E inhibit apoptosis of cultured human term placenta trophoblast. *Placenta*. 2008;29(8):680-90.
18. Pantham P, Heazell AE, Mullard G, Begley P, Chen Q, Brown M, et al. Antiphospholipid Antibodies Alter Cell-Death-Regulating Lipid Metabolites in First and Third Trimester Human Placentae. *Am J Reprod Immunol*. 2015;74(2):181-99.
19. Gangooly S, Muttukrishna S, Jauniaux E. In-vitro study of the effect of anti-hypertensive drugs on placental hormones and angiogenic proteins synthesis in pre-eclampsia. *PloS one*. 2014;9(9):e107644.
20. Mor G, Straszewski-Chavez SL, Abrahams VM. Macrophage-trophoblast interactions. *Methods in molecular medicine*. 2006;122:149-63.
21. Lee SM, Romero R, Lee YJ, Park IS, Park CW, Yoon BH. Systemic inflammatory stimulation by microparticles derived from hypoxic trophoblast as a model for inflammatory response in preeclampsia. *American journal of obstetrics and gynecology*. 2012;207(4):337 e1-8.
22. Aly AS, Khandelwal M, Zhao J, Mehmet AH, Sammel MD, Parry S. Neutrophils are stimulated by syncytiotrophoblast microvillous membranes to generate superoxide radicals in women with preeclampsia. *American journal of obstetrics and gynecology*. 2004;190(1):252-8.
23. Walsh SW. Plasma from preeclamptic women stimulates transendothelial migration of neutrophils. *Reprod Sci*. 2009;16(3):320-5.

24. Hu Y, Dutz JP, MacCalman CD, Yong P, Tan R, von Dadelszen P. Decidual NK cells alter in vitro first trimester extravillous cytotrophoblast migration: a role for IFN-gamma. *J Immunol.* 2006;177(12):8522-30.
25. Alvarez AM, Mulla MJ, Chamley LW, Cadavid AP, Abrahams VM. Aspirin-triggered lipoxin prevents antiphospholipid antibody effects on human trophoblast migration and endothelial cell interactions. *Arthritis Rheumatol.* 2015;67(2):488-97.
26. Xu B, Charlton F, Makris A, Hennessy A. Antihypertensive drugs methyldopa, labetalol, hydralazine, and clonidine improve trophoblast interaction with endothelial cellular networks in vitro. *Journal of hypertension.* 2014;32(5):1075-83; discussion 83.
27. Xu B, Nakhla S, Makris A, Hennessy A. TNF-alpha inhibits trophoblast integration into endothelial cellular networks. *Placenta.* 2011;32(3):241-6.
28. Jiang R, Yan S, Teng Y, Huang Y, Gu J, Li M. Effect of preeclampsia serum on human uterine spiral artery smooth muscle cell apoptosis in a coculture model with cytotrophoblasts. *Gynecologic and obstetric investigation.* 2012;73(3):201-10.
29. Lee JS, Romero R, Han YM, Kim HC, Kim CJ, Hong JS, et al. Placenta-on-a-chip: a novel platform to study the biology of the human placenta. *The journal of maternal-fetal & neonatal medicine : the official journal of the European Association of Perinatal Medicine, the Federation of Asia and Oceania Perinatal Societies, the International Society of Perinatal Obstet.* 2016;29(7):1046-54.
